# Supplementary material for: Identification of a novel CG307 sub-clade in third-generation-cephalosporin-resistant Klebsiella pneumoniae causing invasive infections in the USA
Source: PubMed Central journal article supplement (PMC10926705; doi:10.1099/mgen.0.001201), 2024-02-26
Supplement: mgen-10-1201-s001.pdf [file mgen-10-1201-s001.pdf]

Rate=5.14e+00,MRCA=1997.34,R2=0.40,p<1.00e-04

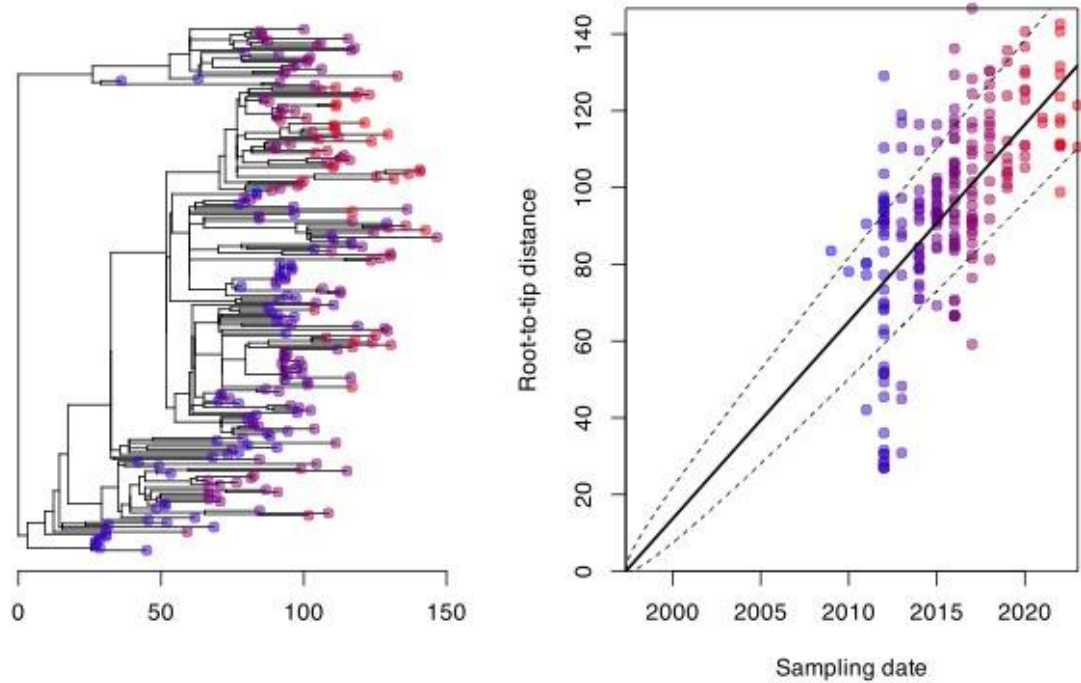

**Fig. S1.** Initial root-to-tip correlation analysis of 224 CG307 isolates. Initial test of Gubbins phylogeny with an estimate  $\mu=5.14$  substitutions/genome, an MRCA = 1997, and significant test of temporal signal. Model testing with a null temporal signal (*i.e.*, all sampling dates equal) phylogeny indicates temporal signal model (model=carc) was significant. We found a strong correlation between the sampling dates and the root-to-tip distances in addition to the significant temporal signal ( $P$ -value<0.05). We selected for 10000 Markov Chain Monte Carlo simulations using a 'carc' model to obtain the dated phylogeny.

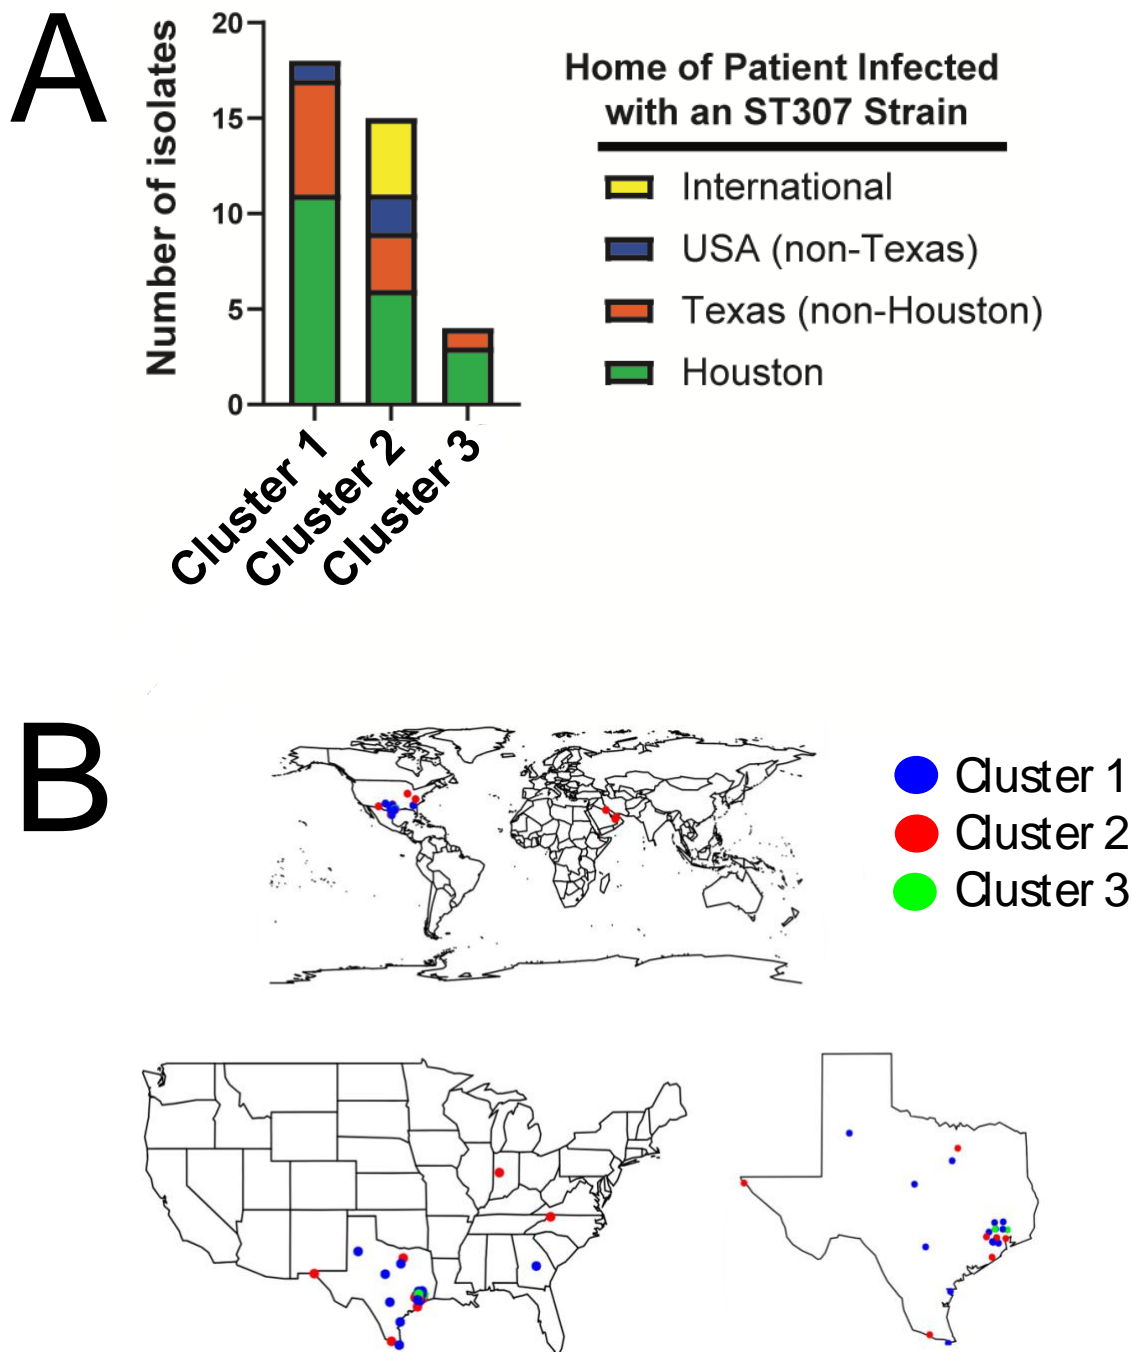

**Supplemental Fig. 2.** Geographic location of patient origin in which CG307 strains caused bacteremia at our institution. (A) X-axis stratifies isolates by clusters identified using hierarchical clustering. Colors of patient origin as shown in legend. (B) Geographical distribution from a world, country, and state perspective. Isolates are colored by cluster as indicated in legend.

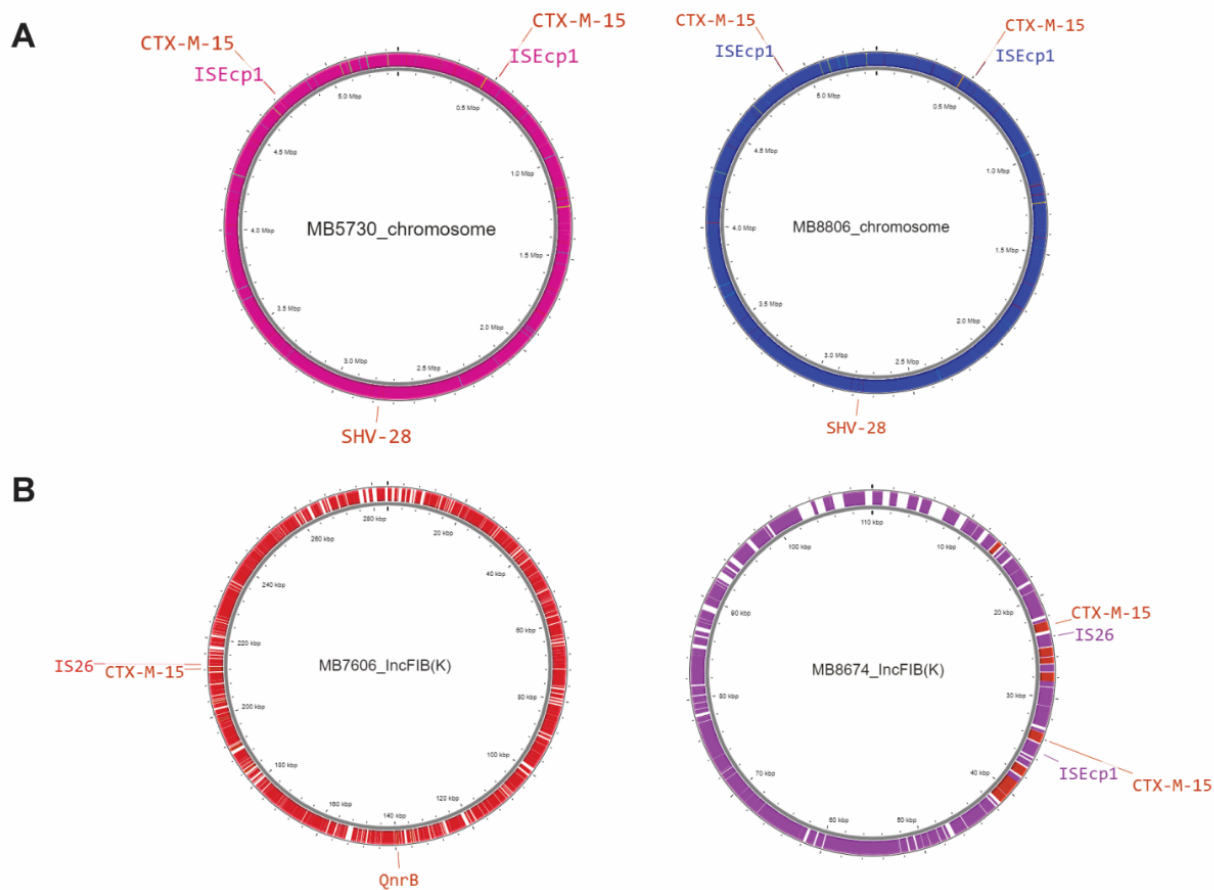

**Supplemental Fig. 3.** Analysis of CG307 *bla*<sub>CTX-M-15</sub> copy number and genomic context from MDA 3GC-RK $\rho$  isolates. (A) CG307 Texas-specific clade isolates (*i.e.*, cluster 3) that have two copies of *bla*<sub>CTX-M-15</sub> present on the chromosome in association with *ISEcp1* as previously described [49]. (B) CG307 global clade MB7606 isolate (*i.e.*, cluster 2) and novel, US-based clade isolate MB8674 (*i.e.*, cluster 1) that have *bla*<sub>CTX-M-15</sub> present in one or more copies on F-type multireplicon plasmids.
